# Supplementary material for: The global pool of simulation exercise materials in health emergency preparedness and response: a scoping review with a health system perspective
Source: PubMed Central journal article supplement — BMJ Glob Health. 2019 Jul 29;4(4):e001687. doi: 10.1136/bmjgh-2019-001687 (PMC6666827; doi:10.1136/bmjgh-2019-001687), 2019-07-29
Supplement: bmjgh-2019-001687supp001.pdf [file bmjgh-2019-001687supp001.pdf]

**Appendix 1**

## Literature Search Strategy

| 1 <sup>st</sup> search: | 2 <sup>nd</sup> search | 3 <sup>rd</sup> search                    |
|-------------------------|------------------------|-------------------------------------------|
| Limits:                 | Limits:                | Limits:                                   |
| · Title/abstract        | · Title/abstract       | · Title/abstract                          |
| · 2007+                 | · 2007+                | · 2007+                                   |
| combined with OR        | combined with OR       | combined with OR                          |
| · exercise              | · disaster*            | · emergency response                      |
| · scenario              | · IHR                  | · public health preparedness and response |
| · simulation            | · terrorism            | · emergency management                    |
| · simulation training   | · bioterrorism         | · emergency preparedness                  |
| · drill                 | · mass casualty        | · public health practice                  |
| · command post          | · emergency            | · capacity building                       |
|                         | · pandemic             | · disaster medicine                       |
|                         | · epidemic*            | · disaster planning                       |
|                         | · disaster*            | · health security                         |
|                         | · natural disaster*    | · health system strengthening             |
|                         | · disease outbreak     | · health system resilience                |
|                         | · influenza            | · contingency                             |
|                         | · ebola                | · Disaster management                     |
|                         |                        | · disaster preparedness                   |
|                         |                        | · disaster response                       |

## Appendix 2

### Institutions Reviewed

| <b><u>Institutions identified by experts:</u></b>                | <b><u>Institutions identified from Academic literature:</u></b>                                                                                                                                                                                                                                                                                                                                                                |
|------------------------------------------------------------------|--------------------------------------------------------------------------------------------------------------------------------------------------------------------------------------------------------------------------------------------------------------------------------------------------------------------------------------------------------------------------------------------------------------------------------|
| World Health Organization (WHO)                                  | Institute of medicine forum on medical and public health preparedness for catastrophic events                                                                                                                                                                                                                                                                                                                                  |
| Public Health England                                            | National centre for study of preparedness and catastrophic events                                                                                                                                                                                                                                                                                                                                                              |
| Centres for Disease Control and Prevention (CDC)                 | Department of homeland security exercise and evaluation programme (HSEEP)                                                                                                                                                                                                                                                                                                                                                      |
| European Centre for Disease Control (ECDC)                       | Office of assistant secretary for preparedness and response (ASPR)                                                                                                                                                                                                                                                                                                                                                             |
| Federal Emergency Management Association (FEMA)                  | Health Canada                                                                                                                                                                                                                                                                                                                                                                                                                  |
| European Civil Protection and Humanitarian Aid Operations (ECHO) | European Network for Infectious Diseases                                                                                                                                                                                                                                                                                                                                                                                       |
| Sante Publique France                                            | Global Health Security Initiative                                                                                                                                                                                                                                                                                                                                                                                              |
|                                                                  | New York Institute for All Hazard Preparation                                                                                                                                                                                                                                                                                                                                                                                  |
|                                                                  | Chemical, Biological, Radiological, Nuclear and Explosives Research and Technology Initiative                                                                                                                                                                                                                                                                                                                                  |
|                                                                  | California Department of Public Health                                                                                                                                                                                                                                                                                                                                                                                         |
|                                                                  | Preparedness and emergency response learning centres:<br>University of Alabam<br>University of Arizona<br>University of South Florida<br>University of Iowa<br>University of Illinois<br>Harvard University<br>Johns Hopkins Bloomberg<br>University of Minnesota<br>University of Albany<br>Columbia University<br>University of Oklahoma<br>University of North Carolina<br>Texas A&M University<br>University of Washington |

### Appendix 3

Materials included in Health System Building Block Analysis

|    | <b>Document name</b>                                                                                                                                    | <b>Identified organisational links</b>                                                                                                                   |
|----|---------------------------------------------------------------------------------------------------------------------------------------------------------|----------------------------------------------------------------------------------------------------------------------------------------------------------|
| 1  | Hospital surge capacity exercise                                                                                                                        | Emergency Preparedness & Response Exercise Programme (Harvard School of Public Health)                                                                   |
| 2  | Addressing the gaps in preparation for quarantine                                                                                                       | New York Institute for All Hazard Preparedness and the New York City Department of Health and Mental Hygiene's Healthcare Emergency Preparedness Program |
| 3  | Assessing and Improving Hospital Mass-Casualty Preparedness: A No-Notice Exercise                                                                       | Office of the Assistant Secretary for Preparedness and Response                                                                                          |
| 4  | Disaster Olympix: a unique nursing emergency preparedness exercise                                                                                      | US Department of Health and Human Services Healthcare Facilities Emergency Care Partnership Programme                                                    |
| 5  | Emergency response: lessons learned during a community hospital's in situ fire simulation                                                               | No organisation identified                                                                                                                               |
| 6  | Personal protective equipment in an influenza pandemic: a UK simulation exercise                                                                        | No organisation identified                                                                                                                               |
| 7  | AHEPP Medical Surge TTX Template                                                                                                                        | Association of Healthcare Emergency Preparedness Professionals                                                                                           |
| 8  | Hazardous material exercise tool                                                                                                                        | Homeland Security Exercise and Evaluation Programme                                                                                                      |
| 9  | Ohio Central Region Hospital Evacuation and Shelter-in-Place Tabletop Exercise.                                                                         | Office of the Assistant Secretary for Preparedness and Response; TRACIE                                                                                  |
| 10 | Tabletop exercise situation manual for earthquake exercise designed to test surge and communication                                                     | Homeland Security Exercise and Evaluation Programme                                                                                                      |
| 11 | Tornado tabletop exercise template                                                                                                                      | Georgia Health Care Association Emergency Preparedness Committee                                                                                         |
| 12 | Simulation of a hospital disaster plan: a virtual, live exercise.                                                                                       | No organisation identified                                                                                                                               |
| 13 | Waterworks, a full-scale chemical exposure exercise: interrogating pediatric critical care surge capacity in an inner-city tertiary care medical center | Homeland Security Exercise and Evaluation Programme                                                                                                      |
| 14 | Business continuity                                                                                                                                     | NHS England                                                                                                                                              |
| 15 | Midsummers nightmares situation manual                                                                                                                  | Homeland Security Exercise and Evaluation Programme                                                                                                      |

|    |                                                                                                                                  |                                                                                                                                                                                     |
|----|----------------------------------------------------------------------------------------------------------------------------------|-------------------------------------------------------------------------------------------------------------------------------------------------------------------------------------|
| 16 | Emergency preparedness in the 21st century: training and preparation modules in virtual environments                             | No organisation identified                                                                                                                                                          |
| 17 | GHSI Emergency radionuclide bioassay laboratory network: summary of a recent exercise                                            | No organisation identified                                                                                                                                                          |
| 18 | Introduction of the Republic of Korea–the United States of America's Joint Exercise Against Biothreats in 2013: Able Response 13 | No organisation identified                                                                                                                                                          |
| 19 | page with links to multiple ebola exercises (field and drill)                                                                    | National Ebola Training and Education Centre                                                                                                                                        |
| 20 | GHSI Emergency radionuclide bioassay laboratory network – Summary of the second exercise                                         | No organisation identified                                                                                                                                                          |
| 21 | Radiological/Nuclear Human Monitoring Tabletop Exercise: Recommendations and Lessons Identified                                  |                                                                                                                                                                                     |
| 22 | Republic of Senegal Disaster Preparedness and Response Exercise: Lessons Learned and Progress Toward Key Goals                   |                                                                                                                                                                                     |
| 23 | Simulation-assisted burn disaster planning                                                                                       | Centre for Teaching and Research in Disaster Medicine, Sweden                                                                                                                       |
| 24 | Clade X                                                                                                                          | Johns Hopkins Centre for Health Security                                                                                                                                            |
| 25 | Dark winter`                                                                                                                     | Johns Hopkins Centre for Health Security                                                                                                                                            |
| 26 | Polio outbreak simulation exercise                                                                                               | WHO Europe                                                                                                                                                                          |
| 27 | WHO Core capacity workbook                                                                                                       | WHO HQ                                                                                                                                                                              |
| 28 | Risk communication : Introduction to exercises                                                                                   | WHO HQ                                                                                                                                                                              |
| 29 | Scripted Surge Pharmacy Pandemic Exercise: Testing Vaccine Administration and Antiviral Dispensing                               | <a href="#">Centre for Disease Control and Prevention &amp; National Association of County and City Health Officials</a>                                                            |
| 30 | Emergency preparedness toolkit for primary care providers                                                                        | Morehouse School of Medicine Center for Community Health and Service Learning, Johns Hoskins PACER Programme, US Dept of Homeland Security and the National Center for Primary Care |
| 31 | Action, not talk: a simulation of risk communication during the first hours of a pandemic                                        | University of Georgia Center for Health and Risk & Centres for Disease Control and Prevention                                                                                       |
| 32 | Addressing Children's Needs in Disasters: A Regional Pediatric Tabletop Exercise                                                 | American Academy of Paediatrics and the Centres for Disease Control & Prevention                                                                                                    |
| 33 | Exercise Maritime Response (EXMR): lessons learned for population monitoring and communications.                                 | No organisation acknowledged                                                                                                                                                        |
| 34 | Field exercises are useful for improving public health emergency responses.                                                      | Population Health Unit, NSW                                                                                                                                                         |
| 35 | Hospital emergency preparedness: Push-POD operation and pharmacists as immunizers                                                | No organisation acknowledged                                                                                                                                                        |

|    |                                                                                                                            |                                                                                                                                                       |
|----|----------------------------------------------------------------------------------------------------------------------------|-------------------------------------------------------------------------------------------------------------------------------------------------------|
| 36 | Just send them all to a burn centre': managing burn resources in a mass casualty incident.                                 | Homeland Security Exercise and Evaluation Programme                                                                                                   |
| 37 | Just-in-time training of dental responders in a simulated pandemic immunization response exercise.                         | DuPage County Health Department, Illinois                                                                                                             |
| 38 | Medical Surge Capacity in Atlanta-Area Hospitals in Response to Tanker Truck Chemical Releases                             | Wheaton, Illinois.                                                                                                                                    |
| 39 | Preparing for a Foreign Animal Disease Outbreak Using a Novel Tabletop Exercise.                                           | Michigan Department of Agriculture and Rural Development, USDA APHIS, Forsman Farms, Inc. and the University of Minnesota                             |
| 40 | Promoting community preparedness: lessons learned from the implementation of a chemical disaster tabletop exercise         | Agriculture and Rural Development                                                                                                                     |
| 41 | Promoting regional disaster preparedness among rural hospitals                                                             | Rural and Community Health Institute, Texas A&M University Health Science Centre                                                                      |
| 42 | Ready or not: analysis of a no-notice mass vaccination field response in Philadelphia.                                     | the Public Health Preparedness Program, Philadelphia Dept of Health                                                                                   |
| 43 | Sarin exposure: a simulation case scenario.                                                                                | No organisation acknowledged                                                                                                                          |
| 44 | Southeastern Center for Emerging Biologic Threats tabletop exercise: foodborne toxoplasmosis outbreak on college campuses  | the Southeastern Center for Emerging Biologic Threats                                                                                                 |
| 45 | The planning, execution, and evaluation of a mass prophylaxis full-scale exercise in cook county, IL                       | Homeland Security Exercise and Evaluation Programme                                                                                                   |
| 46 | California dept of public health-scenarios                                                                                 | California Department of Public Health                                                                                                                |
| 47 | D2.2 Reference set of scenarios                                                                                            | EUs 7th Framework Programme & Norwegian Defence Research Establishment                                                                                |
| 48 | Situation Manual (SitMan): Long Term Care Facility Shelter-In-Place/ Evacuation Tabletop Exercise.                         | Office of the Assistance Secretary for Preparedness and Response                                                                                      |
| 49 | A test of syndromic surveillance using a severe acute respiratory syndrome model                                           | No organisation acknowledged                                                                                                                          |
| 50 | <i>Exercise Paton: A simulation exercise to test New South Wales emergency departments' response to pandemic influenza</i> | New South Wales Department of Health                                                                                                                  |
| 51 | One Health:Operationalizing One Health in the Arctic                                                                       | Indigenous and Northern Affairs, Canada, US Department of State, US Centres for Disease Control and Prevention, Aleutian-Pribilof Islands Association |

**Appendix 4**

Breakdown of materials included in functional review (n=8)

| <b>Title</b>                                                                                                                                                                                         | <b>Source</b>      | <b>Exercise type</b> | <b>Level</b>  |
|------------------------------------------------------------------------------------------------------------------------------------------------------------------------------------------------------|--------------------|----------------------|---------------|
| Eastwood K et al. Field exercises are useful for improving public health emergency responses. Western Pacific Surveillance and Response Journal. 2010                                                | Journal Article    | Field exercise       | Regional      |
| Kilianski A. et al. The planning, execution, and evaluation of a mass prophylaxis full-scale exercise in cook county, IL. Biosecur Bioterror. 2014                                                   | Journal Article    | Field exercise       | Regional      |
| Shah, VS, et al. Waterworks, a full-scale chemical exposure exercise: interrogating pediatric critical care surge capacity in an inner-city tertiary care medical center. Prehosp Disaster Med. 2014 | Journal Article    | Field exercise       | Facility      |
| Polio outbreak simulation exercise. How to test national preparedness plans using the POSE model. World Health Organization Regional Office for Europe. 2015                                         | Guidance Materials | Tabletop             | National      |
| Kim, SS et al. Introduction of the Republic of Korea–the United States of America's Joint Exercise Against Biothreats in 2013: Able Response 13. Osong Public Health and Research Perspectives. 2013 | Journal Article    | Field exercise       | International |
| Eason, MP. Sarin exposure: a simulation case scenario. South Med J. 2013                                                                                                                             | Journal Article    | Field exercise       | Regional      |
| Moorehouse School of Medicine. Emergency preparedness toolkit for primary care providers: hurricane disaster scenario TTX.                                                                           | Guidance Materials | Tabletop             | Primary Care  |
| National Ebola Training and Education Centre. Ebola drill, functional and full scale exercise template. 2018                                                                                         | Guidance Materials | Field exercise       | Facility      |
